# Supplementary material for: Diabetes Medication Use in Association with Survival among Patients of Breast, Colorectal, Lung, or Gastric Cancer
Source: PubMed Central journal article supplement — Cancer Res Treat. 2018 Jul 2;51(2):538–46. doi: 10.4143/crt.2017.591 (PMC6473299; doi:10.4143/crt.2017.591), 2018-07-02
Supplement: crt-2017-591-suppl.pdf [file crt-2017-591-suppl.pdf]

**S1 Table.** Patient characteristics by diabetes status and diabetes medication use

|                                           | Diabetes (%) |      |         | Metformin use (%) |      |         | Sulfonylureas use (%) |      |         | Insulin use (%) |      |         |
|-------------------------------------------|--------------|------|---------|-------------------|------|---------|-----------------------|------|---------|-----------------|------|---------|
|                                           | Yes          | No   | p-value | Yes               | No   | p-value | Yes                   | No   | p-value | Yes             | No   | p-value |
| <b>Age at cancer diagnosis (yr)</b>       |              |      |         |                   |      |         |                       |      |         |                 |      |         |
| 40-49                                     | 1.9          | 5.7  | < 0.01  | 2.1               | 5.0  | < 0.01  | 1.5                   | 5.2  | < 0.01  | 1.9             | 5.2  | < 0.01  |
| 50-59                                     | 20.1         | 28.8 |         | 17.5              | 27.6 |         | 18.6                  | 27.9 |         | 20.2            | 27.5 |         |
| 60-70                                     | 27.2         | 25.4 |         | 26.9              | 25.8 |         | 25.6                  | 26.0 |         | 23.5            | 26.3 |         |
| ≥ 70                                      | 50.8         | 40.1 |         | 53.5              | 41.6 |         | 54.3                  | 40.9 |         | 54.4            | 41.0 |         |
| <b>Sex</b>                                |              |      |         |                   |      |         |                       |      |         |                 |      |         |
| Male                                      | 39.3         | 44.1 | 0.02    | 39.2              | 43.3 | 0.15    | 40.0                  | 56.7 | 0.19    | 49.2            | 41.7 | < 0.01  |
| female                                    | 66.7         | 55.9 |         | 60.8              | 56.7 |         | 60.0                  | 43.3 |         | 50.8            | 58.3 |         |
| <b>Education</b>                          |              |      |         |                   |      |         |                       |      |         |                 |      |         |
| ≤ High school                             | 67.5         | 56.3 | < 0.01  | 68.4              | 58.1 | < 0.01  | 70.2                  | 57.3 | < 0.01  | 70.4            | 57.4 | < 0.01  |
| > High school                             | 32.5         | 43.7 |         | 31.6              | 41.9 |         | 29.8                  | 42.7 |         | 29.6            | 42.6 |         |
| <b>Body mass index (kg/m<sup>2</sup>)</b> |              |      |         |                   |      |         |                       |      |         |                 |      |         |
| < 25                                      | 47.7         | 65.8 | < 0.01  | 63.6              | 40.3 | < 0.01  | 44.4                  | 63.9 | < 0.01  | 54.2            | 62.0 | < 0.01  |
| 25-29                                     | 42.9         | 30.4 |         | 32.0              | 47.7 |         | 44.4                  | 31.8 |         | 36.2            | 33.4 |         |
| ≥ 30                                      | 9.5          | 3.8  |         | 4.4               | 12.0 |         | 11.2                  | 4.3  |         | 9.6             | 4.6  |         |
| <b>Exercise regularly</b>                 |              |      |         |                   |      |         |                       |      |         |                 |      |         |
| No                                        | 53.9         | 60.8 | < 0.01  | 53.5              | 59.6 | 0.03    | 53.8                  | 59.8 | 0.02    | 54.4            | 59.7 | 0.04    |
| Yes                                       | 46.1         | 39.2 |         | 46.5              | 40.4 |         | 46.2                  | 40.2 |         | 45.6            | 40.3 |         |
| <b>Smoking status</b>                     |              |      |         |                   |      |         |                       |      |         |                 |      |         |
| Never                                     | 69.6         | 64.2 | < 0.01  | 71.1              | 65.0 |         | 68.7                  | 65.2 | 0.15    | 62.2            | 66.3 | 0.09    |
| Current/Former                            | 30.4         | 35.8 |         | 28.9              | 35.0 |         | 31.3                  | 34.8 |         | 37.8            | 33.7 |         |
| <b>Comorbidity</b>                        |              |      |         |                   |      |         |                       |      |         |                 |      |         |
| No                                        | 67.2         | 72.3 | < 0.01  | 60.5              | 73.3 | < 0.01  | 64.5                  | 73.2 | < 0.01  | 61.5            | 72.6 | < 0.01  |
| Yes                                       | 32.8         | 27.7 |         | 34.5              | 26.7 |         | 35.5                  | 26.8 |         | 38.5            | 27.4 |         |
| <b>TNM stage</b>                          |              |      |         |                   |      |         |                       |      |         |                 |      |         |
| Stage I                                   | 20.8         | 18.2 | 0.08    | 19.3              | 18.9 | 0.84    | 18.2                  | 19.1 | 0.78    | 17.8            | 19.1 | 0.79    |
| Stage II                                  | 25.5         | 23.9 |         | 26.3              | 24.0 |         | 24.7                  | 24.3 |         | 24.6            | 24.3 |         |
| Stage III                                 | 15.1         | 15.9 |         | 15.8              | 15.7 |         | 15.3                  | 15.8 |         | 16.9            | 15.5 |         |
| Stage IV                                  | 13.8         | 17.7 |         | 14.9              | 16.9 |         | 15.3                  | 16.8 |         | 15.3            | 16.9 |         |
| Unknown                                   | 24.8         | 24.3 |         | 23.7              | 24.5 |         | 26.5                  | 24.0 |         | 25.1            | 24.2 |         |

|                     |      |      |      |      |      |      |      |      |      |      |      |      |
|---------------------|------|------|------|------|------|------|------|------|------|------|------|------|
| <b>Chemotherapy</b> |      |      |      |      |      |      |      |      |      |      |      |      |
| No                  | 30.9 | 28.4 | 0.19 | 31.9 | 28.6 | 0.23 | 33.5 | 28.2 | 0.02 | 33.9 | 28.2 | 0.02 |
| Yes                 | 69.1 | 71.6 |      | 68.1 | 71.4 |      | 66.5 | 71.8 |      | 66.1 | 71.8 |      |
| <b>Radiotherapy</b> |      |      |      |      |      |      |      |      |      |      |      |      |
| No                  | 88.4 | 87.4 | 0.47 | 87.6 | 88.0 | 0.84 | 88.2 | 87.5 | 0.70 | 89.8 | 87.3 | 0.15 |
| Yes                 | 11.6 | 12.6 |      | 12.4 | 12.0 |      | 11.8 | 12.5 |      | 10.2 | 12.7 |      |
| <b>Surgery</b>      |      |      |      |      |      |      |      |      |      |      |      |      |
| No                  | 23.3 | 27.8 | 0.02 | 25.4 | 26.7 | 0.62 | 26.0 | 26.7 | 0.79 | 24.6 | 26.9 | 0.32 |
| Yes                 | 76.7 | 72.2 |      | 74.6 | 73.3 |      | 74.0 | 73.4 |      | 75.4 | 73.1 |      |

---

p-value derived from chi-square test.
